# Supplementary material for: SARS-CoV-2 Neutralizing Antibodies Kinetics Postvaccination in Cancer Patients under Treatment with Immune Checkpoint Inhibition
Source: MDPI journal article supplement (doi:10.3390/cancers14112796), 2022-06-04
Supplement: s1 [file s1]

# SARS-CoV-2 Neutralizing Antibodies Kinetics Postvaccination in Cancer Patients under Treatment with Immune Checkpoint Inhibition

Evangelos Terpos, Michalis Liontos, Oraianthi Fiste, Flora Zagouri, Alexandros Briasoulis, Aimilia D. Sklirou, Christos Markellos, Efthymia Skafida, Alkistis Papatheodoridi, Angeliki Andrikopoulou, Konstantinos Koutsoukos, Maria Kaparelou, Vassiliki A. Iconomidou, Ioannis P. Trougkos and Meletios-Athanasios Dimopoulos

**Table S1.** Case-control comparison regarding baseline characteristics.

| Variables         | Patient cohort ( <i>n</i> = 85); Median (IQR) | Control cohort ( <i>n</i> = 75); Median (IQR) | <i>p</i> -Value |
|-------------------|-----------------------------------------------|-----------------------------------------------|-----------------|
| Age               | 68.04 (62-77)                                 | 65.51 (62-68)                                 | 0.12            |
| BMI               | 26.89 (24-29)                                 | 26.88 (24-29)                                 | 0.47            |
| Sex               |                                               |                                               |                 |
| Male              | 52 (61.18%)                                   | 31 (41.33%)                                   | 0.012           |
| Female            | 33 (38.82%)                                   | 44 (58.67%)                                   |                 |
| Type of vaccine   |                                               |                                               |                 |
| BNT162b2/mRNA1273 | 68 (80%)                                      | 56 (74.67%)                                   | 0.45            |
| AZD1222           | 17 (20%)                                      | 19 (25.33%)                                   |                 |
